# Supplementary material for: The Impact of Nitrogen Application on Leaf and Root Functional Traits of Davidia involucrata Saplings
Source: MDPI journal article supplement (doi:10.3390/f14081668), 2023-08-18
Supplement: s1 [file s1]

**Table S1.** The results of the loadings for each response variables for PCA analysis.

| Response variables         | PC1      | PC2      |
|----------------------------|----------|----------|
| LL                         | 0.21319  | 0.26999  |
| LW                         | 0.22398  | -0.14029 |
| LT                         | 0.2051   | 0.19495  |
| LL:LW                      | -0.03707 | 0.43714  |
| SLA                        | -0.24413 | 0.09222  |
| LTD                        | 0.21102  | -0.09163 |
| RD                         | -0.03134 | 0.08056  |
| SRL                        | 0.20588  | 0.16701  |
| SRA                        | 0.17177  | -0.09162 |
| RTD                        | 0.19453  | 0.10767  |
| Leaf C content             | 0.23886  | -0.10239 |
| Leaf N content             | -0.22479 | 0.01419  |
| Leaf P content             | 0.19786  | 0.29276  |
| Leaf C:N                   | 0.23311  | -0.04283 |
| Leaf C:P                   | 0.06676  | -0.40228 |
| Leaf N:P                   | -0.24095 | -0.07565 |
| Root C content             | -0.2481  | -0.12737 |
| Root N content             | 0.15121  | -0.13336 |
| Root P content             | -0.18606 | 0.31272  |
| Root C:N                   | -0.2423  | -0.0689  |
| Root C:P                   | -0.18681 | -0.33243 |
| Root N:P                   | 0.18531  | -0.28671 |
| Leaf biomass               | 0.22754  | -0.09815 |
| Root biomass               | -0.16198 | 0.01305  |
| Biomass ratio of leaf:root | -0.23985 | 0.04697  |

LL, leaf length; LW, leaf width; LT, leaf thickness; LL:LW, ratio of leaf length:leaf width; SLA, specific leaf area; LTD, leaf tissue density; RD, root diameter; SRA, specific root surface area; SRL, specific root length; RTD, root tissue density.

**Table S2.** The results of One-way ANOVA for the effects of N application on PC1 and PC2.

| Response variables | df | F      | P       |
|--------------------|----|--------|---------|
| PC1                | 3  | 246.92 | < 0.001 |
| PC2                | 3  | 23.70  | < 0.001 |
